# Supplementary material
Source: publisher figshare collection journal article supplement (https://karger.figshare.com/articles/dataset/_/28323710)
Supplement: Supplementary file 1 [file 1]

## CARE Checklist of information to include when writing a case report

(CC) BY-NC-ND

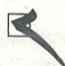

| Topic                                             | Item | Checklist item description                                                                             | Reported on Line                                                    |
|---------------------------------------------------|------|--------------------------------------------------------------------------------------------------------|---------------------------------------------------------------------|
| Title<br>Key Words<br>Abstract<br>(no references) | 1    | The diagnosis or intervention of primary focus followed by the words "case report"                     | <input checked="" type="checkbox"/>                                 |
|                                                   | 2    | 2 to 5 key words that identify diagnoses or interventions in this case report, including "case report" | <input checked="" type="checkbox"/>                                 |
|                                                   | 3a   | Introduction: What is unique about this case and what does it add to the scientific literature?        | <input checked="" type="checkbox"/>                                 |
|                                                   | 3b   | Main symptoms and/or important clinical findings                                                       | <input checked="" type="checkbox"/>                                 |
|                                                   | 3c   | The main diagnoses, therapeutic interventions, and outcomes                                            | <input checked="" type="checkbox"/>                                 |
| Introduction                                      | 3d   | Conclusion—What is the main "take-away" lesson(s) from this case?                                      | <input checked="" type="checkbox"/>                                 |
|                                                   | 4    | One or two paragraphs summarizing why this case is unique ( <b>may include references</b> )            | <input checked="" type="checkbox"/>                                 |
|                                                   | 5a   | De-identified patient specific information                                                             | <input checked="" type="checkbox"/>                                 |
| Patient Information                               | 5b   | Primary concerns and symptoms of the patient                                                           | <input checked="" type="checkbox"/>                                 |
|                                                   | 5c   | Medical, family, and psycho-social history including relevant genetic information                      | <input checked="" type="checkbox"/>                                 |
|                                                   | 5d   | Relevant past interventions with outcomes                                                              | <input checked="" type="checkbox"/>                                 |
| Clinical Findings                                 | 6    | Describe significant physical examination (PE) and important clinical findings                         | <input checked="" type="checkbox"/>                                 |
|                                                   | 7    | Historical and current information from this episode of care organized as a timeline                   | <input checked="" type="checkbox"/>                                 |
|                                                   | 8a   | Diagnostic testing (such as PE, laboratory testing, imaging, surveys)                                  | <input checked="" type="checkbox"/>                                 |
| Diagnostic Assessment                             | 8b   | Diagnostic challenges (such as access to testing, financial, or cultural)                              | <input checked="" type="checkbox"/>                                 |
|                                                   | 8c   | Diagnosis (including other diagnoses considered)                                                       | <input checked="" type="checkbox"/>                                 |
|                                                   | 8d   | Prognosis (such as staging in oncology) where applicable                                               | <input checked="" type="checkbox"/>                                 |
| Therapeutic Intervention                          | 9a   | Types of therapeutic intervention (such as pharmacologic, surgical, preventive, self-care)             | <input checked="" type="checkbox"/>                                 |
|                                                   | 9b   | Administration of therapeutic intervention (such as dosage, strength, duration)                        | <input checked="" type="checkbox"/>                                 |
|                                                   | 9c   | Changes in therapeutic intervention (with rationale)                                                   | <input checked="" type="checkbox"/>                                 |
| Follow-up and Outcomes                            | 10a  | Clinician and patient-assessed outcomes (if available)                                                 | <input checked="" type="checkbox"/>                                 |
|                                                   | 10b  | Important follow-up diagnostic and other test results                                                  | <input checked="" type="checkbox"/>                                 |
|                                                   | 10c  | Intervention adherence and tolerability (How was this assessed?)                                       | <input checked="" type="checkbox"/>                                 |
| Discussion                                        | 10d  | Adverse and unanticipated events                                                                       | <input checked="" type="checkbox"/>                                 |
|                                                   | 11a  | A scientific discussion of the strengths AND limitations associated with this case report              | <input checked="" type="checkbox"/>                                 |
|                                                   | 11b  | Discussion of the relevant medical literature <b>with references</b>                                   | <input checked="" type="checkbox"/>                                 |
|                                                   | 11c  | The scientific rationale for any conclusions (including assessment of possible causes)                 | <input checked="" type="checkbox"/>                                 |
| Patient Perspective                               | 11d  | The primary "take-away" lessons of this case report (without references) in a one paragraph conclusion | <input checked="" type="checkbox"/>                                 |
|                                                   | 12   | The patient should share their perspective in one to two paragraphs on the treatment(s) they received  | <input checked="" type="checkbox"/>                                 |
| Informed Consent                                  | 13   | Did the patient give informed consent? Please provide if requested                                     | Yes <input checked="" type="checkbox"/> No <input type="checkbox"/> |
